# Supplementary material for: Production and shipment of Wolbachia-infected eggs allow controlling Aedes albopictus through the Incompatible Insect Technique on a remote island
Source: Research Square preprint supplement (doi:10.21203/rs.3.rs-6936662/v1), 2025-07-21
Supplement: Supplementary file 2 [file 5702858ec1e12f1967084b49.xlsx]

## Sheet: Feuil1
phase	week	year	date	total_ovitrap	nb_ovitrap_with_hatching	nb_ovitrap_with_wPip_positive	percentage_of_ovitrap_wPip_positive	nb_individual_screened	nb_positive_individual	percentage_contamination	positive traps
I	31	2023	2023-08-02	26	6	1	3.84615	78	1	1.28205	M10
I	36	2023	2023-09-05	26	3	0	0	7	0	0	none
I	39	2023	2023-09-26	26	9	1	3.84615	41	1	2.43902	M21
II	42	2023	2023-10-17	26	10	1	3.84615	52	2	3.84615	M7
II	45	2023	2023-11-07	26	20	2	7.69231	169	6	3.5503	M16 ; M18
III	47	2023	2023-11-24	26	18	3	11.5385	174	11	6.32184	M7 ; M8 ; M18
III	50	2023	2024-12-12	26	13	2	7.69231	107	5	4.6729	M12 ; M21
postrelease	01	2024	2024-01-02	26	9	1	3.84615	89	2	2.24719	M01
postrelease	04	2024	2024-01-23	26	13	3	11.5385	203	3	1.47783	M07 ; M10 ; M19
postrelease	07	2024	2024-02-13	26	13	3	11.5385	100	5	5	M01 ; M04 ; M15
postrelease	08	2024	2024-02-20	26	13	0	0	176	0	0	none
