# Supplementary material for: Production and shipment of Wolbachia-infected eggs allow controlling Aedes albopictus through the Incompatible Insect Technique on a remote island
Source: Research Square preprint supplement (doi:10.21203/rs.3.rs-6936662/v1), 2025-07-21
Supplement: Supplementary file 3 [file 893e9f471294e6b5519117b2.xlsx]

## Sheet: Feuil1
male	female	nb of hatched eggs	nb of unhatched eggs	Total	hatch rate (%)
Le Port	SEY-wPip	23	2776	2799	0.00821722
Le Port	SEY-wPip	30	2855	2885	0.0103986
Le Port	SEY-wPip	8	1860	1868	0.00428266
SEY-wPip	Le Port	2	3088	3090	0.000647249
SEY-wPip	Le Port	72	2338	2410	0.0298755
SEY-wPip	Le Port	4	3627	3631	0.00110162
Le Port	Le Port	4696	576	5272	0.890744
Le Port	Le Port	3337	386	3723	0.89632
Le Port	Le Port	2435	739	3174	0.767171
SEY-wPip	SEY-wPip	3120	639	3759	0.830008
SEY-wPip	SEY-wPip	4245	774	5019	0.845786
SEY-wPip	SEY-wPip	2510	1070	3580	0.701117
La Providence	SEY-wPip	173	1738	1911	0.0905285
La Providence	SEY-wPip	181	1264	1445	0.12526
La Providence	SEY-wPip	111	1560	1671	0.0664273
SEY-wPip	La Providence	6	1918	1924	0.0031185
SEY-wPip	La Providence	6	1646	1652	0.00363196
SEY-wPip	La Providence	5	1119	1124	0.0044484
La Providence	La Providence	620	114	734	0.844687
La Providence	La Providence	482	155	637	0.756672
La Providence	La Providence	816	294	1110	0.735135
S-RUN	SEY-wPip	6	2053	2059	0.00291404
S-RUN	SEY-wPip	7	1641	1648	0.00424757
S-RUN	SEY-wPip	12	1707	1719	0.0069808
SEY-wPip	S-RUN	7	2114	2121	0.00330033
SEY-wPip	S-RUN	36	2549	2585	0.0139265
SEY-wPip	S-RUN	2	3344	3346	0.000597729
S-RUN	S-RUN	1299	319	1618	0.802843
S-RUN	S-RUN	1893	461	2354	0.804163
S-RUN	S-RUN	2224	872	3096	0.718346
