# Supplementary material for: Production and shipment of Wolbachia-infected eggs allow controlling Aedes albopictus through the Incompatible Insect Technique on a remote island
Source: Research Square preprint supplement (doi:10.21203/rs.3.rs-6936662/v1), 2025-07-21
Supplement: Supplementary file 4 [file ed22406d3f11f1daebe8a58a.xlsx]

## Sheet: Feuil1
repetition	date_capture	day_capture	num_BG_trap	nb_marked	nb_unmarked	nb_capture			MRR	day	total_marked	total_unmarked	total_capture	population size
OCTOBRE	2022-10-03	1	CMR 01	2	0	2			october	1	14	26	40	12540
OCTOBRE	2022-10-03	1	CMR 02	0	0	0			october	2	21	16	37	7733
OCTOBRE	2022-10-03	1	CMR 03	6	5	11			october	3	17	20	37	9552.53
OCTOBRE	2022-10-03	1	CMR 04	0	0	0			october	4	16	21	37	10149.6
OCTOBRE	2022-10-03	1	CMR 05	0	0	0			november	1	26	45	71	15516.2
OCTOBRE	2022-10-03	1	CMR 06	1	0	1			november	2	41	33	74	10255.3
OCTOBRE	2022-10-03	1	CMR 07	0	0	0			november	3	9	20	29	18308.7
OCTOBRE	2022-10-03	1	CMR 08	0	0	0			november	4	11	24	35	18079.1
OCTOBRE	2022-10-03	1	CMR 09	3	2	5
OCTOBRE	2022-10-03	1	CMR 10	0	1	1
OCTOBRE	2022-10-03	1	CMR 11	0	0	0
OCTOBRE	2022-10-03	1	CMR 12	1	0	1
OCTOBRE	2022-10-03	1	CMR 13	0	3	3
OCTOBRE	2022-10-03	1	CMR 14	0	1	1
OCTOBRE	2022-10-03	1	CMR 15	0	0	0
OCTOBRE	2022-10-03	1	CMR 16	0	0	0
OCTOBRE	2022-10-03	1	CMR 17	1	1	2
OCTOBRE	2022-10-03	1	CMR 18	0	0	0
OCTOBRE	2022-10-03	1	CMR 19	NA	NA	NA
OCTOBRE	2022-10-03	1	CMR 20	0	0	0
OCTOBRE	2022-10-03	1	CMR 21	0	8	8
OCTOBRE	2022-10-03	1	CMR 22	0	1	1
OCTOBRE	2022-10-03	1	CMR 23	0	0	0
OCTOBRE	2022-10-03	1	CMR 24	0	3	3
OCTOBRE	2022-10-03	1	CMR 25	0	0	0
OCTOBRE	2022-10-03	1	CMR 26	0	1	1
OCTOBRE	2022-10-03	1	CMR 27	0	0	0
OCTOBRE	2022-10-04	2	CMR 01	2	0	2
OCTOBRE	2022-10-04	2	CMR 02	1	0	1
OCTOBRE	2022-10-04	2	CMR 03	6	4	10
OCTOBRE	2022-10-04	2	CMR 04	0	0	0
OCTOBRE	2022-10-04	2	CMR 05	2	1	3
OCTOBRE	2022-10-04	2	CMR 06	0	0	0
OCTOBRE	2022-10-04	2	CMR 07	0	0	0
OCTOBRE	2022-10-04	2	CMR 08	0	0	0
OCTOBRE	2022-10-04	2	CMR 09	4	1	5
OCTOBRE	2022-10-04	2	CMR 10	1	2	3
OCTOBRE	2022-10-04	2	CMR 11	0	0	0
OCTOBRE	2022-10-04	2	CMR 12	2	2	4
OCTOBRE	2022-10-04	2	CMR 13	2	2	4
OCTOBRE	2022-10-04	2	CMR 14	NA	NA	NA
OCTOBRE	2022-10-04	2	CMR 15	0	0	0
OCTOBRE	2022-10-04	2	CMR 16	0	1	1
OCTOBRE	2022-10-04	2	CMR 17	0	0	0
OCTOBRE	2022-10-04	2	CMR 18	0	0	0
OCTOBRE	2022-10-04	2	CMR 19	NA	NA	NA
OCTOBRE	2022-10-04	2	CMR 20	0	0	0
OCTOBRE	2022-10-04	2	CMR 21	0	0	0
OCTOBRE	2022-10-04	2	CMR 22	1	1	2
OCTOBRE	2022-10-04	2	CMR 23	0	0	0
OCTOBRE	2022-10-04	2	CMR 24	0	0	0
OCTOBRE	2022-10-04	2	CMR 25	0	1	1
OCTOBRE	2022-10-04	2	CMR 26	0	1	1
OCTOBRE	2022-10-04	2	CMR 27	0	0	0
OCTOBRE	2022-10-05	3	CMR 01	2	0	2
OCTOBRE	2022-10-05	3	CMR 02	4	0	4
OCTOBRE	2022-10-05	3	CMR 03	7	8	15
OCTOBRE	2022-10-05	3	CMR 04	0	0	0
OCTOBRE	2022-10-05	3	CMR 05	0	4	4
OCTOBRE	2022-10-05	3	CMR 06	0	0	0
OCTOBRE	2022-10-05	3	CMR 07	0	0	0
OCTOBRE	2022-10-05	3	CMR 08	0	0	0
OCTOBRE	2022-10-05	3	CMR 09	0	0	0
OCTOBRE	2022-10-05	3	CMR 10	0	1	1
OCTOBRE	2022-10-05	3	CMR 11	0	0	0
OCTOBRE	2022-10-05	3	CMR 12	2	0	2
OCTOBRE	2022-10-05	3	CMR 13	0	3	3
OCTOBRE	2022-10-05	3	CMR 14	1	4	5
OCTOBRE	2022-10-05	3	CMR 15	0	0	0
OCTOBRE	2022-10-05	3	CMR 16	0	0	0
OCTOBRE	2022-10-05	3	CMR 17	0	0	0
OCTOBRE	2022-10-05	3	CMR 18	0	0	0
OCTOBRE	2022-10-05	3	CMR 19	NA	NA	NA
OCTOBRE	2022-10-05	3	CMR 20	0	0	0
OCTOBRE	2022-10-05	3	CMR 21	0	0	0
OCTOBRE	2022-10-05	3	CMR 22	0	0	0
OCTOBRE	2022-10-05	3	CMR 23	0	0	0
OCTOBRE	2022-10-05	3	CMR 24	1	0	1
OCTOBRE	2022-10-05	3	CMR 25	0	0	0
OCTOBRE	2022-10-05	3	CMR 26	0	0	0
OCTOBRE	2022-10-05	3	CMR 27	0	0	0
OCTOBRE	2022-10-06	4	CMR 01	0	0	0
OCTOBRE	2022-10-06	4	CMR 02	4	1	5
OCTOBRE	2022-10-06	4	CMR 03	4	5	9
OCTOBRE	2022-10-06	4	CMR 04	0	0	0
OCTOBRE	2022-10-06	4	CMR 05	1	5	6
OCTOBRE	2022-10-06	4	CMR 06	0	0	0
OCTOBRE	2022-10-06	4	CMR 07	0	0	0
OCTOBRE	2022-10-06	4	CMR 08	0	0	0
OCTOBRE	2022-10-06	4	CMR 09	0	1	1
OCTOBRE	2022-10-06	4	CMR 10	3	0	3
OCTOBRE	2022-10-06	4	CMR 11	0	0	0
OCTOBRE	2022-10-06	4	CMR 12	2	4	6
OCTOBRE	2022-10-06	4	CMR 13	1	0	1
OCTOBRE	2022-10-06	4	CMR 14	1	1	2
OCTOBRE	2022-10-06	4	CMR 15	0	0	0
OCTOBRE	2022-10-06	4	CMR 16	0	0	0
OCTOBRE	2022-10-06	4	CMR 17	0	0	0
OCTOBRE	2022-10-06	4	CMR 18	0	0	0
OCTOBRE	2022-10-06	4	CMR 19	NA	NA	NA
OCTOBRE	2022-10-06	4	CMR 20	0	0	0
OCTOBRE	2022-10-06	4	CMR 21	0	1	1
OCTOBRE	2022-10-06	4	CMR 22	0	1	1
OCTOBRE	2022-10-06	4	CMR 23	0	0	0
OCTOBRE	2022-10-06	4	CMR 24	0	0	0
OCTOBRE	2022-10-06	4	CMR 25	0	1	1
OCTOBRE	2022-10-06	4	CMR 26	0	1	1
OCTOBRE	2022-10-06	4	CMR 27	0	0	0
NOVEMBRE	2022-10-31	1	CMR 01	0	0	0
NOVEMBRE	2022-10-31	1	CMR 02	7	1	8
NOVEMBRE	2022-10-31	1	CMR 03	2	3	5
NOVEMBRE	2022-10-31	1	CMR 04	0	0	0
NOVEMBRE	2022-10-31	1	CMR 05	0	7	7
NOVEMBRE	2022-10-31	1	CMR 06	1	0	1
NOVEMBRE	2022-10-31	1	CMR 07	0	0	0
NOVEMBRE	2022-10-31	1	CMR 08	0	0	0
NOVEMBRE	2022-10-31	1	CMR 09	0	0	0
NOVEMBRE	2022-10-31	1	CMR 10	2	0	2
NOVEMBRE	2022-10-31	1	CMR 11	2	2	4
NOVEMBRE	2022-10-31	1	CMR 12	5	4	9
NOVEMBRE	2022-10-31	1	CMR 13	2	1	3
NOVEMBRE	2022-10-31	1	CMR 14	0	1	1
NOVEMBRE	2022-10-31	1	CMR 15	0	0	0
NOVEMBRE	2022-10-31	1	CMR 16	1	0	1
NOVEMBRE	2022-10-31	1	CMR 17	0	0	0
NOVEMBRE	2022-10-31	1	CMR 18	0	0	0
NOVEMBRE	2022-10-31	1	CMR 19	NA	NA	NA
NOVEMBRE	2022-10-31	1	CMR 20	0	0	0
NOVEMBRE	2022-10-31	1	CMR 21	0	0	0
NOVEMBRE	2022-10-31	1	CMR 22	0	8	8
NOVEMBRE	2022-10-31	1	CMR 23	3	7	10
NOVEMBRE	2022-10-31	1	CMR 24	1	2	3
NOVEMBRE	2022-10-31	1	CMR 25	0	6	6
NOVEMBRE	2022-10-31	1	CMR 26	0	0	0
NOVEMBRE	2022-10-31	1	CMR 27	0	3	3
NOVEMBRE	2022-11-01	2	CMR 01	2	0	2
NOVEMBRE	2022-11-01	2	CMR 02	15	7	22
NOVEMBRE	2022-11-01	2	CMR 03	1	1	2
NOVEMBRE	2022-11-01	2	CMR 04	0	1	1
NOVEMBRE	2022-11-01	2	CMR 05	1	2	3
NOVEMBRE	2022-11-01	2	CMR 06	0	0	0
NOVEMBRE	2022-11-01	2	CMR 07	0	0	0
NOVEMBRE	2022-11-01	2	CMR 08	1	0	1
NOVEMBRE	2022-11-01	2	CMR 09	2	0	2
NOVEMBRE	2022-11-01	2	CMR 10	3	3	6
NOVEMBRE	2022-11-01	2	CMR 11	0	0	0
NOVEMBRE	2022-11-01	2	CMR 12	11	9	20
NOVEMBRE	2022-11-01	2	CMR 13	0	0	0
NOVEMBRE	2022-11-01	2	CMR 14	0	2	2
NOVEMBRE	2022-11-01	2	CMR 15	0	0	0
NOVEMBRE	2022-11-01	2	CMR 16	1	0	1
NOVEMBRE	2022-11-01	2	CMR 17	0	0	0
NOVEMBRE	2022-11-01	2	CMR 18	0	0	0
NOVEMBRE	2022-11-01	2	CMR 19	NA	NA	NA
NOVEMBRE	2022-11-01	2	CMR 20	0	0	0
NOVEMBRE	2022-11-01	2	CMR 21	0	0	0
NOVEMBRE	2022-11-01	2	CMR 22	2	3	5
NOVEMBRE	2022-11-01	2	CMR 23	0	1	1
NOVEMBRE	2022-11-01	2	CMR 24	1	0	1
NOVEMBRE	2022-11-01	2	CMR 25	1	4	5
NOVEMBRE	2022-11-01	2	CMR 26	0	0	0
NOVEMBRE	2022-11-01	2	CMR 27	0	0	0
NOVEMBRE	2022-11-02	3	CMR 01	0	0	0
NOVEMBRE	2022-11-02	3	CMR 02	2	1	3
NOVEMBRE	2022-11-02	3	CMR 03	2	2	4
NOVEMBRE	2022-11-02	3	CMR 04	0	0	0
NOVEMBRE	2022-11-02	3	CMR 05	0	0	0
NOVEMBRE	2022-11-02	3	CMR 06	1	1	2
NOVEMBRE	2022-11-02	3	CMR 07	1	0	1
NOVEMBRE	2022-11-02	3	CMR 08	0	0	0
NOVEMBRE	2022-11-02	3	CMR 09	0	0	0
NOVEMBRE	2022-11-02	3	CMR 10	0	1	1
NOVEMBRE	2022-11-02	3	CMR 11	0	0	0
NOVEMBRE	2022-11-02	3	CMR 12	2	1	3
NOVEMBRE	2022-11-02	3	CMR 13	0	2	2
NOVEMBRE	2022-11-02	3	CMR 14	0	0	0
NOVEMBRE	2022-11-02	3	CMR 15	0	0	0
NOVEMBRE	2022-11-02	3	CMR 16	0	0	0
NOVEMBRE	2022-11-02	3	CMR 17	0	0	0
NOVEMBRE	2022-11-02	3	CMR 18	1	1	2
NOVEMBRE	2022-11-02	3	CMR 19	NA	NA	NA
NOVEMBRE	2022-11-02	3	CMR 20	0	0	0
NOVEMBRE	2022-11-02	3	CMR 21	0	0	0
NOVEMBRE	2022-11-02	3	CMR 22	0	6	6
NOVEMBRE	2022-11-02	3	CMR 23	0	3	3
NOVEMBRE	2022-11-02	3	CMR 24	0	2	2
NOVEMBRE	2022-11-02	3	CMR 25	0	0	0
NOVEMBRE	2022-11-02	3	CMR 26	0	0	0
NOVEMBRE	2022-11-02	3	CMR 27	0	0	0
NOVEMBRE	2022-11-03	4	CMR 01	1	1	2
NOVEMBRE	2022-11-03	4	CMR 02	3	2	5
NOVEMBRE	2022-11-03	4	CMR 03	0	0	0
NOVEMBRE	2022-11-03	4	CMR 04	0	0	0
NOVEMBRE	2022-11-03	4	CMR 05	0	0	0
NOVEMBRE	2022-11-03	4	CMR 06	1	1	2
NOVEMBRE	2022-11-03	4	CMR 07	3	0	3
NOVEMBRE	2022-11-03	4	CMR 08	0	2	2
NOVEMBRE	2022-11-03	4	CMR 09	0	2	2
NOVEMBRE	2022-11-03	4	CMR 10	0	0	0
NOVEMBRE	2022-11-03	4	CMR 11	0	0	0
NOVEMBRE	2022-11-03	4	CMR 12	0	1	1
NOVEMBRE	2022-11-03	4	CMR 13	1	3	4
NOVEMBRE	2022-11-03	4	CMR 14	0	0	0
NOVEMBRE	2022-11-03	4	CMR 15	0	0	0
NOVEMBRE	2022-11-03	4	CMR 16	0	0	0
NOVEMBRE	2022-11-03	4	CMR 17	0	0	0
NOVEMBRE	2022-11-03	4	CMR 18	1	0	1
NOVEMBRE	2022-11-03	4	CMR 19	NA	NA	NA
NOVEMBRE	2022-11-03	4	CMR 20	0	0	0
NOVEMBRE	2022-11-03	4	CMR 21	0	0	0
NOVEMBRE	2022-11-03	4	CMR 22	0	5	5
NOVEMBRE	2022-11-03	4	CMR 23	0	3	3
NOVEMBRE	2022-11-03	4	CMR 24	0	0	0
NOVEMBRE	2022-11-03	4	CMR 25	1	4	5
NOVEMBRE	2022-11-03	4	CMR 26	0	0	0
NOVEMBRE	2022-11-03	4	CMR 27	0	0	0
